# Supplementary material
Source: PubMed Central journal article supplement (PMC7920533)

**Supplemental Figure 1. Manhattan (A) and quantile-quantile (B) plots for single-variant association testing results.** Genomic inflation factor ( $\lambda$ ) = 1.021. Horizontal dotted line indicates the genome-wide significance threshold of  $5 \times 10^{-8}$ .

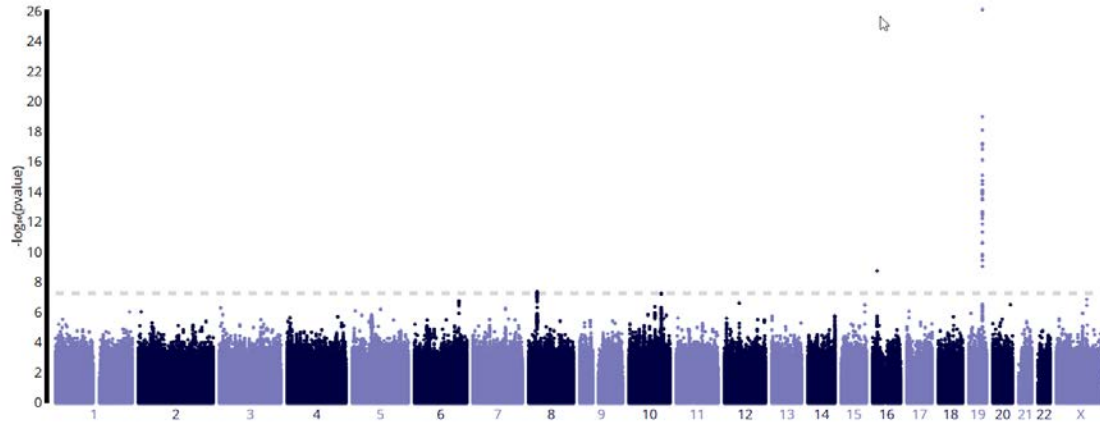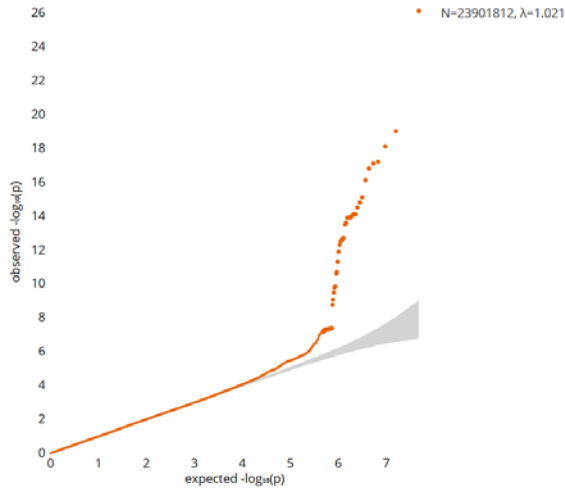

Supplement: NIHMS1668912-supplement-Supplemental_Figure_1.pdf [file NIHMS1668912-supplement-Supplemental_Figure_1.pdf]
