# Supplementary material
Source: PubMed Central journal article supplement (PMC7920533)
Supplement: NIHMS1668912-supplement-Supplemental_Table_1.pdf [file NIHMS1668912-supplement-Supplemental_Table_1.pdf]

Logistic regression models for rs10852375 (MYH11 locus)

|               | Everyone   |           |           |          |                      | No APOE E4 carriers |           |          |           |                      | APOE E4 carriers |           |          |          |                      | APOE E4 interaction |           |          |          |                      |           |          |          |          |
|---------------|------------|-----------|-----------|----------|----------------------|---------------------|-----------|----------|-----------|----------------------|------------------|-----------|----------|----------|----------------------|---------------------|-----------|----------|----------|----------------------|-----------|----------|----------|----------|
|               | Odds Ratio | Std. Err. | z         | P> z     | [95% Conf. Interval] | Odds Ratio          | Std. Err. | z        | P> z      | [95% Conf. Interval] | Odds Ratio       | Std. Err. | z        | P> z     | [95% Conf. Interval] | Odds Ratio          | Std. Err. | z        | P> z     | [95% Conf. Interval] |           |          |          |          |
| age           | 1.0480     | 0.0049    | 10.0600   | 0.00E+00 | 1.0385               | 1.0577              | 1.0535    | 0.0061   | 8.9300    | 0.00E+00             | 1.0415           | 1.0656    | 1.0469   | 0.0088   | 5.4600               | 0.00E+00            | 1.0298    | 1.0643   | 1.0513   | 0.0050               | 10.4600   | 0.00E+00 | 1.0415   | 1.0612   |
| _lnew_race_2  | 1.9779     | 2.6195    | 0.5200    | 6.07E-01 | 0.1475               | 26.5153             | 24.4298   | 47.8770  | 1.6300    | 1.03E-01             | 0.5245           | 1137.8540 | 0.0525   | 0.1089   | -1.4200              | 1.56E-01            | 0.0009    | 3.0656   | 1.7757   | 2.3245               | 0.4400    | 6.61E-01 | 0.1365   | 23.1021  |
| _lnew_race_3  | 2.5607     | 1.7687    | 1.3600    | 1.73E-01 | 0.6613               | 9.9153              | 3.5449    | 3.9929   | 1.1200    | 2.61E-01             | 0.3898           | 32.2391   | 2.0364   | 1.9334   | 0.7500               | 4.54E-01            | 0.3168    | 13.0915  | 2.6008   | 1.8169               | 1.3700    | 1.71E-01 | 0.6614   | 10.2272  |
| _lnew_race_4  | 2.8523     | 1.8860    | 1.5900    | 1.13E-01 | 0.7805               | 10.4241             | 4.6060    | 4.9175   | 1.4300    | 1.53E-01             | 0.5683           | 37.3337   | 1.7472   | 1.7514   | 0.5600               | 5.78E-01            | 0.2450    | 12.4616  | 2.9122   | 1.9425               | 1.6000    | 1.09E-01 | 0.7879   | 10.7641  |
| _lnew_race_5  | 2.0082     | 1.2160    | 1.1500    | 2.50E-01 | 0.6129               | 6.5799              | 3.5890    | 3.6666   | 1.2500    | 2.11E-01             | 0.4846           | 26.5807   | 1.0119   | 0.8230   | 0.0100               | 9.88E-01            | 0.2055    | 4.9820   | 2.0528   | 1.2518               | 1.1800    | 2.38E-01 | 0.6213   | 6.7829   |
| pc1           | 8.21E-05   | 1.13E-03  | -6.90E-01 | 4.93E-01 | 1.71E-16             | 3.93E+07            | 1.48E-02  | 2.65E-01 | -2.40E-01 | 8.14E-01             | 9.03E-18         | 2.44E+13  | 2.49E-13 | 5.91E-12 | -1.22E+00            | 2.22E-01            | 1.54E-33  | 4.02E+07 | 2.65E-06 | 3.78E-05             | -9.00E-01 | 3.69E-01 | 1.85E-18 | 3.79E+06 |
| pc2           | 4.05E-02   | 6.13E-01  | -2.10E-01 | 8.32E-01 | 5.44E-15             | 3.02E+11            | 4.05E-14  | 8.76E-13 | -1.43E+00 | 1.54E-01             | 1.60E-32         | 1.02E+05  | 3.48E+17 | 8.57E+18 | 1.64E+00             | 1.01E-01            | 3.89E-04  | 3.12E+38 | 2.81E-01 | 4.19E+00             | -9.00E-02 | 9.32E-01 | 5.76E-14 | 1.37E+12 |
| pc3           | 1.49E-01   | 4.60E-01  | -6.20E-01 | 5.37E-01 | 3.57E-04             | 6.25E+01            | 4.34E+01  | 1.59E+02 | 1.03E+00  | 3.01E-01             | 3.40E-02         | 5.55E+04  | 2.36E-05 | 1.53E-04 | -1.64E+00            | 1.00E-01            | 7.09E-11  | 7.84E+00 | 5.91E-01 | 1.84E+00             | -1.70E-01 | 8.66E-01 | 1.34E-03 | 2.61E+02 |
| pc4           | 1.94E-03   | 1.39E-02  | -8.70E-01 | 3.85E-01 | 1.47E-09             | 2.56E+03            | 9.56E+02  | 9.11E+03 | 7.20E-01  | 4.72E-01             | 7.33E-06         | 1.25E+11  | 5.34E-12 | 7.37E-11 | -1.88E+00            | 6.00E-02            | 9.62E-24  | 2.96E+00 | 3.57E-03 | 2.56E-02             | -7.90E-01 | 4.32E-01 | 2.79E-09 | 4.58E+03 |
| pc5           | 9.72E-04   | 2.97E-03  | -2.27E+00 | 2.30E-02 | 2.41E-06             | 3.92E-01            | 1.41E-03  | 5.26E-03 | -1.76E+00 | 7.80E-02             | 9.58E-07         | 2.08E+00  | 6.16E-03 | 3.47E-02 | -9.00E-01            | 3.66E-01            | 9.83E-08  | 3.86E+02 | 1.58E-03 | 4.87E-03             | -2.09E+00 | 3.70E-02 | 3.73E-06 | 6.67E-01 |
| pc6           | 2.34E+01   | 6.96E+01  | 1.06E+00  | 2.88E-01 | 7.00E-02             | 7.85E+03            | 7.27E+00  | 2.47E+01 | 5.80E-01  | 5.60E-01             | 9.30E-03         | 5.68E+03  | 2.37E+01 | 1.50E+02 | 5.00E-01             | 6.17E-01            | 9.73E-05  | 5.77E+06 | 8.82E+00 | 2.65E+01             | 7.30E-01  | 4.68E-01 | 2.47E-02 | 3.16E+03 |
| pc7           | 1.98E-01   | 6.08E-01  | -5.30E-01 | 5.98E-01 | 4.83E-04             | 8.13E+01            | 1.05E-01  | 4.34E-01 | -5.40E-01 | 5.86E-01             | 3.11E-05         | 3.52E+02  | 1.27E-01 | 6.74E-01 | -3.90E-01            | 6.97E-01            | 3.84E-06  | 4.19E+03 | 9.62E-02 | 3.02E-01             | -7.50E-01 | 4.55E-01 | 2.06E-04 | 4.49E+01 |
| pc8           | 4.37E-01   | 1.24E+00  | -2.90E-01 | 7.70E-01 | 1.70E-03             | 1.13E+02            | 1.02E+00  | 3.56E+00 | 0.00E+00  | 9.96E-01             | 1.05E-03         | 9.82E+02  | 3.35E-01 | 1.70E+00 | -2.20E-01            | 8.30E-01            | 1.59E-05  | 7.07E+03 | 6.34E-01 | 1.83E+00             | -1.60E-01 | 8.74E-01 | 2.25E-03 | 1.79E+02 |
| pc9           | 4.84E+00   | 1.39E+01  | 5.50E-01  | 5.83E-01 | 1.74E-02             | 1.35E+03            | 1.13E+01  | 4.01E+01 | 6.90E-01  | 4.93E-01             | 1.10E-02         | 1.17E+04  | 6.02E-01 | 3.15E+00 | -1.00E-01            | 9.23E-01            | 2.13E-05  | 1.70E+04 | 3.85E+00 | 1.13E+01             | 4.60E-01  | 6.45E-01 | 1.25E-02 | 1.19E+03 |
| pc10          | 8.42E+00   | 2.41E+01  | 7.40E-01  | 4.57E-01 | 3.07E-02             | 2.31E+03            | 5.94E-01  | 2.08E+00 | -1.50E-01 | 8.82E-01             | 6.15E-04         | 5.74E+02  | 3.89E+03 | 2.06E+04 | 1.56E+00             | 1.18E-01            | 1.22E-01  | 1.24E+08 | 9.87E+00 | 2.88E+01             | 7.80E-01  | 4.33E-01 | 3.24E-02 | 3.01E+03 |
| osflag        | 1.1426     | 0.0676    | 2.2500    | 2.40E-02 | 1.0174               | 1.2831              | 1.1830    | 0.0862   | 2.3100    | 2.10E-02             | 1.0257           | 1.3645    | 1.0242   | 0.1113   | 0.2200               | 8.26E-01            | 0.8278    | 1.2672   | 1.13E+00 | 6.82E-02             | 2.03E+00  | 4.20E-02 | 1.00E+00 | 1.27E+00 |
| rs10852375    | 1.2995     | 0.0537    | 6.3400    | 0.00E+00 | 1.1984               | 1.4091              | 1.3379    | 0.0681   | 5.7200    | 0.00E+00             | 1.2109           | 1.4781    | 1.2551   | 0.0954   | 2.9900               | 3.00E-03            | 1.0814    | 1.4567   | 1.3363   | 0.0679               | 5.7100    | 0.00E+00 | 1.2097   | 1.4761   |
| _IAPOE4_1     |            |           |           |          |                      |                     |           |          |           |                      |                  |           |          |          |                      |                     |           |          | 2.0421   | 0.2073               | 7.0300    | 0.00E+00 | 1.6736   | 2.4917   |
| _IAPOXrs108_1 |            |           |           |          |                      |                     |           |          |           |                      |                  |           |          |          |                      |                     |           |          | 0.9298   | 0.0845               | -0.8000   | 4.23E-01 | 0.7780   | 1.1111   |
| cons          | 0.0026     | 0.0017    | -8.8400   | 0.00E+00 | 0.0007               | 0.0096              | 0.0008    | 0.0009   | -6.5500   | 0.00E+00             | 0.0001           | 0.0068    | 0.0091   | 0.0089   | -4.8100              | 0.00E+00            | 0.0013    | 0.0619   | 0.0017   | 0.0011               | -9.3500   | 0.00E+00 | 0.0004   | 0.0063   |

Logistic regression models for rs352214 (FZD3 locus)

|              | Everyone   |           |           |          |                      | No APOE E4 carriers |           |          |           |                      | APOE E4 carriers |           |          |          |                      | APOE E4 interaction |           |          |          |                      |           |          |          |          |
|--------------|------------|-----------|-----------|----------|----------------------|---------------------|-----------|----------|-----------|----------------------|------------------|-----------|----------|----------|----------------------|---------------------|-----------|----------|----------|----------------------|-----------|----------|----------|----------|
|              | Odds Ratio | Std. Err. | z         | P> z     | [95% Conf. Interval] | Odds Ratio          | Std. Err. | z        | P> z      | [95% Conf. Interval] | Odds Ratio       | Std. Err. | z        | P> z     | [95% Conf. Interval] | Odds Ratio          | Std. Err. | z        | P> z     | [95% Conf. Interval] |           |          |          |          |
| age          | 1.0482     | 0.0049    | 10.0800   | 0.00E+00 | 1.0386               | 1.0578              | 1.0532    | 0.0061   | 8.8800    | 0.00E+00             | 1.0412           | 1.0653    | 1.0484   | 0.0088   | 5.6300               | 0.00E+00            | 1.0313    | 1.0657   | 1.0515   | 0.0050               | 10.5000   | 0.00E+00 | 1.0417   | 1.0614   |
| _lnew_race_2 | 1.8917     | 2.5153    | 0.4800    | 6.32E-01 | 0.1397               | 25.6249             | 24.4628   | 48.4286  | 1.6100    | 1.06E-01             | 0.5051           | 1184.7190 | 0.0504   | 0.1027   | -1.4700              | 1.42E-01            | 0.0009    | 2.7265   | 1.6666   | 2.1847               | 0.3900    | 6.97E-01 | 0.1277   | 21.7584  |
| _lnew_race_3 | 2.6303     | 1.8160    | 1.4000    | 1.61E-01 | 0.6797               | 10.1789             | 3.5799    | 4.0358   | 1.1300    | 2.58E-01             | 0.3929           | 32.6186   | 2.0581   | 1.9425   | 0.7600               | 4.44E-01            | 0.3236    | 13.0876  | 2.6075   | 1.8193               | 1.3700    | 1.70E-01 | 0.6642   | 10.2361  |
| _lnew_race_4 | 2.6647     | 1.7558    | 1.4900    | 1.37E-01 | 0.7325               | 9.6944              | 4.4376    | 4.7315   | 1.4000    | 1.62E-01             | 0.5490           | 35.8695   | 1.4132   | 1.4198   | 0.3400               | 7.31E-01            | 0.1973    | 10.1250  | 2.6795   | 1.7793               | 1.4800    | 1.38E-01 | 0.7291   | 9.8469   |
| _lnew_race_5 | 1.8459     | 1.1173    | 1.0100    | 3.11E-01 | 0.5636               | 6.0456              | 3.3218    | 3.3948   | 1.1700    | 2.40E-01             | 0.4482           | 24.6195   | 0.8745   | 0.7080   | -0.1700              | 8.68E-01            | 0.1789    | 4.2743   | 1.8595   | 1.1319               | 1.0200    | 3.08E-01 | 0.5640   | 6.1312   |
| pc1          | 3.27E-07   | 4.50E-06  | -1.09E+00 | 2.77E-01 | 6.53E-19             | 1.64E+05            | 9.07E-05  | 1.62E-03 | -5.20E-01 | 6.03E-01             | 5.18E-20         | 1.59E+11  | 3.39E-16 | 8.04E-15 | -1.50E+00            | 1.33E-01            | 2.21E-36  | 5.21E+04 | 1.48E-08 | 2.12E-07             | -1.26E+00 | 2.07E-01 | 1.01E-20 | 2.17E+04 |
| pc2          | 1.63E-02   | 2.47E-01  | -2.70E-01 | 7.86E-01 | 1.86E-15             | 1.42E+11            | 6.25E-15  | 1.37E-13 | -1.49E+00 | 1.36E-01             | 1.38E-33         | 2.83E+04  | 2.52E+17 | 6.09E+18 | 1.66E+00             | 9.70E-02            | 6.87E-04  | 9.26E+37 | 1.15E-01 | 1.72E+00             | -1.40E-01 | 8.85E-01 | 2.18E-14 | 6.07E+11 |
| pc3          | 1.19E-01   | 3.65E-01  | -6.90E-01 | 4.89E-01 | 2.82E-04             | 4.98E+01            | 4.16E+01  | 1.52E+02 | 1.02E+00  | 3.08E-01             | 3.20E-02         | 5.40E+04  | 8.33E-06 | 5.39E-05 | -1.81E+00            | 7.10E-02            | 2.56E-11  | 2.71E+00 | 4.32E-01 | 1.34E+00             | -2.70E-01 | 7.87E-01 | 9.77E-04 | 1.91E+02 |
| pc4          | 3.58E-03   | 2.57E-02  | -7.80E-01 | 4.33E-01 | 2.77E-09             | 4.62E+03            | 1.33E+03  | 1.27E+04 | 7.50E-01  | 4.54E-01             | 9.03E-06         | 1.95E+11  | 7.27E-11 | 1.01E-09 | -1.68E+00            | 9.20E-02            | 1.14E-22  | 4.65E+01 | 6.19E-03 | 4.43E-02             | -7.10E-01 | 4.77E-01 | 5.05E-09 | 7.59E+03 |
| pc5          | 1.53E-03   | 4.67E-03  | -2.12E+00 | 3.40E-02 | 3.83E-06             | 6.09E-01            | 2.58E-03  | 9.58E-03 | -1.60E+00 | 1.09E-01             | 1.77E-06         | 3.75E+00  | 5.09E-03 | 2.87E-02 | -9.40E-01            | 3.49E-01            | 8.07E-08  | 3.21E+02 | 2.24E-03 | 6.89E-03             | -1.98E+00 | 4.80E-02 | 5.32E-06 | 9.39E-01 |
| pc6          | 2.00E+01   | 5.93E+01  | 1.01E+00  | 3.12E-01 | 6.01E-02             | 6.67E+03            | 4.91E+00  | 1.66E+01 | 4.70E-01  | 6.39E-01             | 6.40E-03         | 3.77E+03  | 5.45E+01 | 3.46E+02 | 6.30E-01             | 5.28E-01            | 2.19E-04  | 1.36E+07 | 7.75E+00 | 2.32E+01             | 6.80E-01  | 4.94E-01 | 2.18E-02 | 2.76E+03 |
| pc7          | 2.64E-01   | 8.12E-01  | -4.30E-01 | 6.65E-01 | 6.40E-04             | 1.09E+02            | 1.76E-01  | 7.31E-01 | -4.20E-01 | 6.76E-01             | 5.09E-05         | 6.07E+02  | 6.55E-02 | 3.48E-01 | -5.10E-01            | 6.08E-01            | 1.98E-06  | 2.16E+03 | 1.21E-01 | 3.80E-01             | -6.70E-01 | 5.01E-01 | 2.60E-04 | 5.66E+01 |
| pc8          | 3.45E-01   | 9.79E-01  | -3.80E-01 | 7.08E-01 | 1.34E-03             | 8.92E+01            | 9.16E-01  | 3.21E+00 | -3.00E-02 | 9.80E-01             | 9.50E-04         | 8.82E+02  | 1.48E-01 | 7.56E-01 | -3.70E-01            | 7.08E-01            | 6.85E-06  | 3.22E+03 | 4.79E-01 | 1.38E+00             | -2.60E-01 | 7.98E-01 | 1.69E-03 | 1.35E+02 |
| pc9          | 3.82E+00   | 1.10E+01  | 4.70E-01  | 6.41E-01 | 1.36E-02             | 1.07E+03            | 9.86E+00  | 3.50E+01 | 6.50E-01  | 5.19E-01             | 9.44E-03         | 1.03E+04  | 3.57E-01 | 1.87E+00 | -2.00E-01            | 8.44E-01            | 1.24E-05  | 1.02E+04 | 2.97E+00 | 8.69E+00             | 3.70E-01  | 7.10E-01 | 9.54E-03 | 9.22E+02 |
| pc10         | 8.69E+00   | 2.49E+01  | 7.60E-01  | 4.50E-01 | 3.17E-02             | 2.38E+03            | 7.17E-01  | 2.51E+00 | -9.00E-02 | 9.24E-01             | 7.50E-04         | 6.87E+02  | 3.71E+03 | 1.96E+04 | 1.55E+00             | 1.21E-01            | 1.16E-01  | 1.19E+08 | 1.09E+01 | 3.18E+01             | 8.20E-01  | 4.13E-01 | 3.59E-02 | 3.31E+03 |
| osflag       | 1.1272     | 0.0666    | 2.0200    | 4.30E-02 | 1.0038               | 1.2657              | 1.1650    | 0.0847   | 2.1000    | 3.60E-02             | 1.               |           |          |          |                      |                     |           |          |          |                      |           |          |          |          |
