# Supplementary material
Source: PubMed Central journal article supplement (PMC7920533)
Supplement: NIHMS1668912-supplement-Supplemental_Table_2.pdf [file NIHMS1668912-supplement-Supplemental_Table_2.pdf]

Logistic regression models for rs10852375 (MYH11 locus)

|               | Everyone   |           |       |       |                      | no HRT     |           |           |       |                      | HRT ever   |           |           |           |                      | HRT interaction |           |           |           |                      |       |       |           |           |
|---------------|------------|-----------|-------|-------|----------------------|------------|-----------|-----------|-------|----------------------|------------|-----------|-----------|-----------|----------------------|-----------------|-----------|-----------|-----------|----------------------|-------|-------|-----------|-----------|
|               | Odds Ratio | Std. Err. | z     | P> z  | [95% Conf. Interval] | Odds Ratio | Std. Err. | z         | P> z  | [95% Conf. Interval] | Odds Ratio | Std. Err. | z         | P> z      | [95% Conf. Interval] | Odds Ratio      | Std. Err. | z         | P> z      | [95% Conf. Interval] |       |       |           |           |
| age           | 1.048035   | 0.0048897 | 10.06 | 0     | 1.038495             | 1.057663   | 1.056028  | 0.0071638 | 8.04  | 0                    | 1.042081   | 1.070163  | 1.042274  | 0.0068003 | 6.35                 | 0               | 1.029031  | 1.055688  | 1.049     | 0.0049235            | 10.19 | 0     | 1.039394  | 1.058694  |
| _lnew_race_2  | 1.977922   | 2.619459  | 0.52  | 0.607 | 0.147544             | 26.51532   | 1033942   | 6.02E+08  | 0.02  | 0.981                | 0          | 0         | 0.9608106 | 1.942391  | -0.02                | 0.984           | 0.018274  | 50.51747  | 2.002279  | 2.649158             | 0.52  | 0.6   | 0.1497353 | 26.77473  |
| _lnew_race_3  | 2.560665   | 1.768729  | 1.36  | 0.173 | 0.6613049            | 9.91525    | 2064293   | 1.20E+09  | 0.02  | 0.98                 | 0          | 0         | 0.7036773 | 0.5605812 | -0.44                | 0.659           | 0.1476617 | 3.353353  | 2.571156  | 1.774047             | 1.37  | 0.171 | 0.6649917 | 9.941242  |
| _lnew_race_4  | 2.852327   | 1.886043  | 1.59  | 0.113 | 0.7804759            | 10.42411   | 1546185   | 9.00E+08  | 0.02  | 0.98                 | 0          | 0         | 1.32228   | 1.030723  | 0.36                 | 0.72            | 0.2869512 | 6.093103  | 2.921095  | 1.93221              | 1.62  | 0.105 | 0.7989197 | 10.68041  |
| _lnew_race_5  | 2.008161   | 1.215989  | 1.15  | 0.25  | 0.6128803            | 6.57993    | 856464.2  | 4.98E+08  | 0.02  | 0.981                | 0          | 0         | 1.294546  | 0.8282278 | 0.4                  | 0.687           | 0.3694311 | 4.536295  | 2.039471  | 1.235213             | 1.18  | 0.239 | 0.6222778 | 6.684221  |
| pc1           | 0.0000821  | 0.001126  | -0.69 | 0.493 | 1.71E-16             | 3.93E+07   | 1.04E-12  | 1.86E-11  | -1.55 | 0.121                | 7.22E-28   | 1507.976  | 5832885   | 1.25E+08  | 0.72                 | 0.469           | 2.93E-12  | 1.16E+25  | 0.0002246 | 0.0030797            | -0.61 | 0.54  | 4.76E-16  | 1.06E+08  |
| pc2           | 0.0405282  | 0.6128854 | -0.21 | 0.832 | 5.44E-15             | 3.02E+11   | 0.0087637 | 0.1648552 | -0.25 | 0.801                | 8.52E-19   | 9.01E+13  | 0.024146  | 0.5989822 | -0.15                | 0.881           | 1.85E-23  | 3.15E+19  | 0.0354556 | 0.5358991            | -0.22 | 0.825 | 4.83E-15  | 2.60E+11  |
| pc3           | 0.1493645  | 0.4600151 | -0.62 | 0.537 | 0.000357             | 62.4872    | 0.4068509 | 1.748454  | -0.21 | 0.834                | 0.0000894  | 1851.395  | 0.0689262 | 0.3073308 | -0.6                 | 0.549           | 0.000011  | 430.2832  | 0.1831137 | 0.5642628            | -0.55 | 0.582 | 0.0004363 | 76.85791  |
| pc4           | 0.0019396  | 0.0139461 | -0.87 | 0.385 | 1.47E-09             | 2557.839   | 0.1185374 | 1.057063  | -0.24 | 0.811                | 3.04E-09   | 4618323   | 0.0000193 | 0.0002308 | -0.91                | 0.364           | 1.25E-15  | 297004.4  | 0.0018828 | 0.0135361            | -0.87 | 0.383 | 1.43E-09  | 2479.897  |
| pc5           | 0.0009717  | 0.0029748 | -2.27 | 0.023 | 2.41E-06             | 0.3920887  | 6.54E-08  | 2.99E-07  | -3.62 | 0                    | 8.33E-12   | 0.0005133 | 18.3837   | 78.2481   | 0.68                 | 0.494           | 0.0043792 | 77174.51  | 0.0009287 | 0.0028593            | -2.27 | 0.023 | 2.22E-06  | 0.3878293 |
| pc6           | 23.44613   | 69.55185  | 1.06  | 0.288 | 0.0699877            | 7854.535   | 42.68118  | 173.4785  | 0.92  | 0.356                | 0.0148085  | 123016.2  | 10.8703   | 47.75518  | 0.54                 | 0.587           | 0.0019804 | 59665.46  | 22.4734   | 66.78245             | 1.05  | 0.295 | 0.0664078 | 7605.334  |
| pc7           | 0.1981961  | 0.6084042 | -0.53 | 0.598 | 0.0048332            | 81.28964   | 0.0091626 | 0.0409015 | -1.05 | 0.293                | 1.45E-06   | 57.77676  | 2.49155   | 11.28574  | 0.2                  | 0.84            | 0.0003474 | 17868.06  | 0.1843213 | 0.5657226            | -0.55 | 0.582 | 0.0004498 | 75.52667  |
| pc8           | 0.4374263  | 1.239278  | -0.29 | 0.77  | 0.0016957            | 112.838    | 0.0119369 | 0.0470763 | -1.12 | 0.262                | 5.25E-06   | 27.15362  | 28.38862  | 117.6997  | 0.81                 | 0.42            | 0.0083955 | 95993.28  | 0.5150675 | 1.465223             | -0.23 | 0.816 | 0.0019518 | 135.9233  |
| pc9           | 4.836435   | 13.89183  | 0.55  | 0.583 | 0.0173618            | 1347.272   | 49.68559  | 205.7896  | 0.94  | 0.346                | 0.0148147  | 166635.7  | 0.4387543 | 1.757447  | -0.21                | 0.837           | 0.0001709 | 1126.526  | 4.569518  | 13.13363             | 0.53  | 0.597 | 0.0163441 | 1277.553  |
| pc10          | 8.421516   | 24.13016  | 0.74  | 0.457 | 0.0306509            | 2313.86    | 3.297351  | 13.58825  | 0.29  | 0.772                | 0.0010242  | 10615.33  | 16.88411  | 67.63665  | 0.71                 | 0.48            | 0.0065708 | 43384.77  | 8.422014  | 24.14313             | 0.74  | 0.457 | 0.0305705 | 2320.22   |
| osflag        | 1.142579   | 0.0676298 | 2.25  | 0.024 | 1.017426             | 1.283125   | 1.101813  | 0.0936457 | 1.14  | 0.254                | 0.9327439  | 1.301528  | 1.13501   | 0.0960436 | 1.5                  | 0.134           | 0.9615497 | 1.339762  | 1.121547  | 0.0670506            | 1.92  | 0.055 | 0.9975374 | 1.260973  |
| rs10852375    | 1.299488   | 0.0536834 | 6.34  | 0     | 1.198417             | 1.409082   | 1.294236  | 0.0745579 | 4.48  | 0                    | 1.156053   | 1.448936  | 1.299205  | 0.0777215 | 4.38                 | 0               | 1.155465  | 1.460827  | 1.28945   | 0.0738411            | 4.44  | 0     | 1.152551  | 1.442611  |
| _IHRTever_1   |            |           |       |       |                      |            |           |           |       |                      |            |           |           |           |                      |                 |           |           | 1.117435  | 0.1047927            | 1.18  | 0.236 | 0.9298155 | 1.342912  |
| _IHRTxrs108_1 |            |           |       |       |                      |            |           |           |       |                      |            |           |           |           |                      |                 |           |           | 1.012852  | 0.0836788            | 0.15  | 0.877 | 0.961435  | 1.190885  |
| _cons         | 0.0025556  | 0.0017251 | -8.84 | 0     | 0.0006806            | 0.0095955  | 3.10E-09  | 1.80E-06  | -0.03 | 0.973                | 0          | 0         | 0.0069445 | 0.0052432 | -6.58                | 0               | 0.0015811 | 0.0305011 | 0.0022671 | 0.0015389            | -8.97 | 0     | 0.0005993 | 0.0085757 |

Logistic regression models for rs352214 (FZD3 locus)

|               | Everyone   |           |           |          |                      | no HRT     |              |                 |           |                      | HRT ever   |           |          |          |                      | HRT interaction |           |          |          |                      |           |          |          |          |
|---------------|------------|-----------|-----------|----------|----------------------|------------|--------------|-----------------|-----------|----------------------|------------|-----------|----------|----------|----------------------|-----------------|-----------|----------|----------|----------------------|-----------|----------|----------|----------|
|               | Odds Ratio | Std. Err. | z         | P> z     | [95% Conf. Interval] | Odds Ratio | Std. Err.    | z               | P> z      | [95% Conf. Interval] | Odds Ratio | Std. Err. | z        | P> z     | [95% Conf. Interval] | Odds Ratio      | Std. Err. | z        | P> z     | [95% Conf. Interval] |           |          |          |          |
| age           | 1.0482     | 0.0049    | 10.0800   | 0.00E+00 | 1.0386               | 1.0578     | 1.0568       | 0.0072          | 8.1400    | 0.00E+00             | 1.0428     | 1.0709    | 1.0418   | 0.0068   | 6.2800               | 0.00E+00        | 1.0286    | 1.0552   | 1.0491   | 0.0049               | 10.2100   | 0.00E+00 | 1.0395   | 1.0588   |
| _lnew_race_2  | 1.8917     | 2.5153    | 0.4800    | 6.32E-01 | 0.1397               | 25.6249    | 1027183.0000 | 604000000.0000  | 0.0200    | 9.81E-01             | 0.0000     | 0         | 0.9280   | 1.8671   | -0.0400              | 9.70E-01        | 0.0180    | 47.8745  | 1.9657   | 2.6067               | 0.5100    | 6.10E-01 | 0.1461   | 26.4402  |
| _lnew_race_3  | 2.6303     | 1.8160    | 1.4000    | 1.61E-01 | 0.6797               | 10.1789    | 2023811.0000 | 1190000000.0000 | 0.0200    | 9.80E-01             | 0.0000     | 0         | 0.7663   | 0.6128   | -0.3300              | 7.39E-01        | 0.1599    | 3.6731   | 2.6519   | 1.8290               | 1.4100    | 1.57E-01 | 0.6862   | 10.2478  |
| _lnew_race_4  | 2.6647     | 1.7558    | 1.4900    | 1.37E-01 | 0.7325               | 9.6944     | 1484892.0000 | 872000000.0000  | 0.0200    | 9.81E-01             | 0.0000     | 0         | 1.2259   | 0.9433   | 0.2600               | 7.91E-01        | 0.2713    | 5.5388   | 2.7599   | 1.8182               | 1.5400    | 1.23E-01 | 0.7588   | 10.0384  |
| _lnew_race_5  | 1.8459     | 1.1173    | 1.0100    | 3.11E-01 | 0.5636               | 6.0456     | 796136.5000  | 468000000.0000  | 0.0200    | 9.82E-01             | 0.0000     | 0         | 1.1945   | 0.7643   | 0.2800               | 7.81E-01        | 0.3408    | 4.1865   | 1.8861   | 1.1425               | 1.0500    | 2.95E-01 | 0.5754   | 6.1824   |
| pc1           | 3.27E-07   | 4.50E-06  | -1.09E+00 | 2.77E-01 | 6.53E-19             | 1.64E+05   | 5.70E-14     | 1.01E-12        | -1.72E+00 | 8.60E-02             | 4.45E-29   | 7.31E+01  | 2.09E+03 | 4.53E+04 | 3.50E-01             | 7.24E-01        | 8.13E-16  | 5.39E+21 | 1.14E-06 | 1.56E-05             | -1.00E+00 | 3.19E-01 | 2.34E-18 | 5.53E+05 |
| pc2           | 1.63E-02   | 2.47E-01  | -2.70E-01 | 7.86E-01 | 1.86E-15             | 1.42E+11   | 2.17E-03     | 4.12E-02        | -3.20E-01 | 7.46E-01             | 1.65E-19   | 2.87E+13  | 1.19E-02 | 2.95E-01 | -1.80E-01            | 8.58E-01        | 1.12E-23  | 1.27E+19 | 1.11E-02 | 1.68E-01             | -3.00E-01 | 7.67E-01 | 1.37E-15 | 8.99E+10 |
| pc3           | 1.19E-01   | 3.65E-01  | -6.90E-01 | 4.89E-01 | 2.82E-04             | 4.98E+01   | 3.17E-01     | 1.36E+00        | -2.70E-01 | 7.89E-01             | 6.97E-05   | 1.44E+03  | 6.53E-02 | 2.91E-01 | -6.10E-01            | 5.41E-01        | 1.05E-05  | 4.07E+02 | 1.53E-01 | 4.73E-01             | -6.10E-01 | 5.43E-01 | 3.64E-04 | 6.46E+01 |
| pc4           | 3.58E-03   | 2.57E-02  | -7.80E-01 | 4.33E-01 | 2.77E-09             | 4.62E+03   | 1.97E-01     | 1.76E+00        | -1.80E-01 | 8.56E-01             | 4.82E-09   | 8.07E+06  | 3.86E-05 | 4.21E-04 | -8.70E-01            | 3.84E-01        | 3.49E-15  | 3.67E+05 | 3.42E-03 | 2.45E-02             | -7.90E-01 | 4.28E-01 | 2.78E-09 | 4.22E+03 |
| pc5           | 1.53E-03   | 4.67E-03  | -2.12E+00 | 3.40E-02 | 3.83E-06             | 6.09E-01   | 1.16E-07     | 5.30E-07        | -3.50E+00 | 0.00E+00             | 1.53E-11   | 8.80E-04  | 3.86E-01 | 1.22E+02 | 7.90E-01             | 4.31E-01        | 6.82E-03  | 1.20E+05 | 1.46E-03 | 4.47E-03             | -2.13E+00 | 3.40E-02 | 3.52E-06 | 6.01E-01 |
| pc6           | 2.00E+01   | 5.93E+01  | 1.01E+00  | 3.12E-01 | 6.01E-02             | 6.67E+03   | 4.46E+01     | 1.81E+02        | 9.30E-01  | 3.50E-01             | 1.55E-02   | 1.28E+05  | 6.31E+00 | 2.76E+01 | 4.20E-01             | 6.74E-01        | 1.17E-03  | 3.39E+04 | 1.80E+01 | 5.35E+01             | 9.70E-01  | 3.30E-01 | 5.38E-02 | 6.05E+03 |
| pc7           | 2.64E-01   | 8.12E-01  | -4.30E-01 | 6.65E-01 | 6.40E-04             | 1.09E+02   | 1.50E-02     | 6.69E-02        | -9.40E-01 | 3.46E-01             | 2.43E-06   | 9.29E+01  | 2.99E+00 | 1.37E+01 | 2.40E-01             | 8.10E-01        | 3.95E-04  | 2.27E+04 | 2.44E-01 | 7.51E-01             | -4.60E-01 | 6.47E-01 | 5.88E-04 | 1.01E+02 |
| pc8           | 3.45E-01   | 9.79E-01  | -3.80E-01 | 7.08E-01 | 1.34E-03             | 8.92E+01   | 1.22E-02     | 4.80E-02        | -1.12E+00 | 2.63E-01             | 5.42E-06   | 2.75E+01  | 1.21E+01 | 5.04E+01 | 6.00E-01             | 5.49E-01        | 3.50E-03  | 4.19E+04 | 3.47E-01 | 9.88E-01             | -3.70E-01 | 7.10E-01 | 1.31E-03 | 9.20E+01 |
| pc9           | 3.82E+00   | 1.10E+01  | 4.70E-01  | 6.41E-01 | 1.36E-02             | 1.07E+03   | 3.84E+01     | 1.59E+02        | 8.80E-01  | 3.78E-01             | 1.16E-02   | 1.28E+05  | 3.80E-01 | 1.53E+00 | -2.40E-01            | 8.10E-01        | 1.43E-04  | 1.01E+03 | 3.74E+00 | 1.08E+01             | 4.60E-01  | 6.47E-01 | 1.32E-02 | 1.06E+03 |
| pc10          | 8.69E+00   | 2.49E+01  | 7.60E-01  | 4.50E-01 | 3.17E-02             | 2.38E+03   | 3.62E+00     | 1.49E+01        | 3.10E-01  | 7.55E-01             | 1.13E-03   | 1.16E+04  | 1.74E+01 | 6.97E+01 | 7.10E-01             | 4.76E-01        | 6.76E-03  | 4.48E+04 | 8.55E+00 | 2.45E+01             | 7.50E-01  | 4.54E-01 | 3.11E-02 | 2.35E+03 |
| osflag        | 1.1272     | 0.0666    | 2.0200    | 4.30E-02 | 1.0038               | 1.2657     | 0.0920       | 0.9700          | 3.31E-01  | 0.9196               | 1.2821     | 1.1189    | 0.0948   | 1.3300   | 1.85E-01             | 0.9477          | 1.3209    | 1.1049   | 0.0660   | 1.6700               | 9.50E-02  | 0.9828   | 1.2421   |          |
| FZD3_rs352214 | 0.8636     | 0.0256    | -4.9500   | 0.00E+00 | 0.8149               |            |              |                 |           |                      |            |           |          |          |                      |                 |           |          |          |                      |           |          |          |          |
