# Supplementary material
Source: PubMed Central journal article supplement (PMC7920533)
Supplement: NIHMS1668912-supplement-Supplemental_Table_4.pdf [file NIHMS1668912-supplement-Supplemental_Table_4.pdf]

**Supplemental Table 4. Single-variant association stratified by self-reported ancestry group.** SNV: single nucleotide variant, GROUP: self-reported ancestry group, N: sample size, MAF: minor allele frequency, OR: odds ratio, CI: confidence interval, Z: Z-score, *P*: *P* value, NA: association not tested due to low allele count. Nominally significant results are highlighted in bold ( $P < 0.05$ ).

| SNV                        | GROUP             | N     | MAF   | OR   | 95% CI    | Z     | <i>P</i>       |
|----------------------------|-------------------|-------|-------|------|-----------|-------|----------------|
| <i>FZD3</i><br>rs352214    | European-American | 8,203 | 0.425 | 0.79 | 0.72-0.87 | -5.15 | < <b>1E-05</b> |
|                            | African-American  | 1,315 | 0.313 | 0.97 | 0.75-1.27 | -0.20 | 0.8420         |
|                            | Hispanic-American | 276   | 0.422 | 0.80 | 0.48-1.36 | -0.82 | 0.4130         |
|                            | Other             | 228   | 0.381 | 0.47 | 0.23-0.99 | -1.99 | <b>0.0460</b>  |
| <i>MYH11</i><br>rs10852375 | European-American | 8,203 | 0.406 | 1.27 | 1.16-1.39 | 5.33  | < <b>1E-05</b> |
|                            | African-American  | 1,318 | 0.390 | 1.29 | 1.02-1.63 | 2.10  | <b>0.0360</b>  |
|                            | Hispanic-American | 276   | 0.411 | 2.16 | 1.22-3.83 | 2.63  | <b>0.0090</b>  |
|                            | Other             | 228   | 0.318 | 1.95 | 0.94-4.00 | 1.81  | 0.0710         |
