# Supplementary material
Source: PubMed Central journal article supplement (PMC7920533)
Supplement: NIHMS1668912-supplement-Supplemental_Table_5.pdf [file NIHMS1668912-supplement-Supplemental_Table_5.pdf]

**Supplemental Table 5: Rare variants contributing to *GOLGA8B* association.** Abbreviations: CHR = chromosome, POS = base pair position on GRCh38 reference genome, REF = reference allele, ALT = alternate allele, N = sample size, AAC = alternate allele count, DP = mean read depth, AAC<sub>max</sub> = maximum alternate allele count, AAF<sub>max</sub> = maximum alternate allele frequency, POP<sub>max</sub> = population with AAC<sub>max</sub>, Consequence = most severe consequence in *GOLGA8B*, NA: not applicable. Max values are from gnomAD v3, which includes samples from the Women's Health Initiative study.

| CHR:POS:REF:ALT             | N <sub>control</sub> | AAC <sub>control</sub> | N <sub>case</sub> | AAC <sub>case</sub> | DP | AAC <sub>max</sub> | AAF <sub>max</sub> | POP <sub>max</sub>   | Consequence      |
|-----------------------------|----------------------|------------------------|-------------------|---------------------|----|--------------------|--------------------|----------------------|------------------|
| chr15:34527704:CTCCTGGTGG:C | 9422                 | 0                      | 1598              | 1                   | 18 | 1                  | 4.20E-05           | African              | Inframe deletion |
| chr15:34527750:G:A          | 9422                 | 0                      | 1598              | 1                   | 19 | 1                  | 2.00E-05           | Non-Finnish European | Missense         |
| chr15:34528007:G:GA         | 9421                 | 1                      | 1599              | 0                   | 9  | 1                  | 2.85E-05           | Non-Finnish European | Frameshift       |
| chr15:34531667:TTC:T        | 9422                 | 0                      | 1598              | 1                   | 8  | 1                  | 7.86E-04           | Ashkenazi Jewish     | Frameshift       |
| chr15:34532861:GTCAT:G      | 9422                 | 0                      | 1597              | 2                   | 23 | 3                  | 7.76E-05           | African              | Frameshift       |
| chr15:34533008:G:T          | 9422                 | 0                      | 1598              | 1                   | 8  | 0                  | NA                 | NA                   | Missense         |
| chr15:34533118:C:A          | 9421                 | 1                      | 1599              | 0                   | 4  | 2                  | 6.33E-04           | Non-Finnish European | Missense         |
| chr15:34574916:T:C          | 9421                 | 1                      | 1598              | 1                   | 34 | 2                  | 6.38E-04           | East Asian           | Splice acceptor  |
