# Supplementary material
Source: PubMed Central journal article supplement (PMC7920533)
Supplement: NIHMS1668912-supplement-Supplemental_Table_6.pdf [file NIHMS1668912-supplement-Supplemental_Table_6.pdf]

**Supplemental Table 6. Prior evidence of association between *FZD3*, *GOLGA8B*, *MYH11*, and *SORCS3* and Alzheimer's disease or related traits.** Variant is color-delimited chromosome, hg19/GRCh37 position, reference allele, alternate allele. Source is the niagads.org study identifier where available or the PubMed identifier where unavailable. Results pulled from gene-based queries of the GenomicsDB browser (<https://beta.niagads.org/genomics/app>).

| gene           | relative_position | variant          | rsID        | allele | P        | study                                               | source         |
|----------------|-------------------|------------------|-------------|--------|----------|-----------------------------------------------------|----------------|
| <i>FZD3</i>    | upstream          | 8:28276765:G:A   | rs185248758 | A      | 2.25E-05 | Transethnic LOAD: APOE ε4 Non-Carriers              | NG00056        |
| <i>FZD3</i>    | upstream          | 8:28276765:G:A   | rs185248758 | A      | 5.09E-04 | Transethnic LOAD: All Samples                       | NG00056        |
| <i>FZD3</i>    | upstream          | 8:28339391:T:C   | rs7008943   | T      | 7.24E-04 | ADGC LOAD: African Americans - APOE Adj             | NG00039        |
| <i>FZD3</i>    | upstream          | 8:28343742:C:T   | rs113911657 | T      | 9.13E-04 | ADGC LOAD: African Americans - APOE Adj             | NG00039        |
| <i>FZD3</i>    | in gene           | 8:28352784:C:T   | rs116590489 | T      | 7.11E-04 | ADGC LOAD: African Americans - APOE Adj             | NG00039        |
| <i>FZD3</i>    | in gene           | 8:28355032:C:T   | rs114011519 | T      | 7.14E-04 | ADGC LOAD: African Americans - APOE Adj             | NG00039        |
| <i>FZD3</i>    | in gene           | 8:28368841:A:G   | rs185721863 | A      | 7.24E-04 | ADGC LOAD: African Americans - APOE Adj             | NG00039        |
| <i>FZD3</i>    | in gene           | 8:28369191:C:T   | rs112869558 | T      | 7.25E-04 | ADGC LOAD: African Americans - APOE Adj             | NG00039        |
| <i>FZD3</i>    | in gene           | 8:28373434:G:C   | rs143861681 | C      | 7.32E-04 | ADGC LOAD: African Americans - APOE Adj             | NG00039        |
| <i>FZD3</i>    | in gene           | 8:28380410:C:T   | rs138856659 | T      | 7.13E-04 | ADGC LOAD: African Americans - APOE Adj             | NG00039        |
| <i>FZD3</i>    | in gene           | 8:28381451:A:G   | rs116203574 | A      | 7.09E-04 | ADGC LOAD: African Americans - APOE Adj             | NG00039        |
| <i>FZD3</i>    | in gene           | 8:28382931:A:C   | rs147385833 | A      | 7.10E-04 | ADGC LOAD: African Americans - APOE Adj             | NG00039        |
| <i>FZD3</i>    | in gene           | 8:28389747:T:C   | rs116603973 | T      | 7.20E-04 | ADGC LOAD: African Americans - APOE Adj             | NG00039        |
| <i>FZD3</i>    | in gene           | 8:28392543:T:G   | rs10503830  | T      | 9.95E-04 | IGAP Stage 1 - ADGC Subset                          | NG00053        |
| <i>FZD3</i>    | in gene           | 8:28393353:C:T   | rs141694880 | T      | 7.30E-04 | ADGC LOAD: African Americans - APOE Adj             | NG00039        |
| <i>FZD3</i>    | in gene           | 8:28402409:G:T   | rs113121803 | T      | 7.30E-04 | ADGC LOAD: African Americans - APOE Adj             | NG00039        |
| <i>FZD3</i>    | in gene           | 8:28402998:G:T   | rs114902677 | T      | 7.29E-04 | ADGC LOAD: African Americans - APOE Adj             | NG00039        |
| <i>FZD3</i>    | in gene           | 8:28407157:A:G   | rs115125323 | A      | 7.29E-04 | ADGC LOAD: African Americans - APOE Adj             | NG00039        |
| <i>FZD3</i>    | in gene           | 8:28411419:G:A   | rs142187675 | A      | 7.35E-04 | ADGC LOAD: African Americans - APOE Adj             | NG00039        |
| <i>FZD3</i>    | in gene           | 8:28412123:G:A   | rs116132817 | A      | 7.60E-04 | ADGC LOAD: African Americans - APOE Adj             | NG00039        |
| <i>FZD3</i>    | in gene           | 8:28415535:T:C   | rs114934167 | T      | 7.67E-04 | ADGC LOAD: African Americans - APOE Adj             | NG00039        |
| <i>FZD3</i>    | downstream        | 8:28432020:A:G   | rs144203190 | A      | 7.81E-04 | ADGC LOAD: African Americans - APOE Adj             | NG00039        |
| <i>FZD3</i>    | downstream        | 8:28433612:A:C   | rs114574069 | A      | 7.81E-04 | ADGC LOAD: African Americans - APOE Adj             | NG00039        |
| <i>FZD3</i>    | downstream        | 8:28435318:T:A   | rs139087419 | A      | 7.80E-04 | ADGC LOAD: African Americans - APOE Adj             | NG00039        |
| <i>FZD3</i>    | downstream        | 8:28436756:A:G   | rs145984783 | A      | 8.05E-04 | ADGC LOAD: African Americans - APOE Adj             | NG00039        |
| <i>FZD3</i>    | downstream        | 8:28438687:T:C   | rs147709402 | T      | 8.10E-04 | ADGC LOAD: African Americans - APOE Adj             | NG00039        |
| <i>FZD3</i>    | downstream        | 8:28524153:C:T   | rs11785298  | T      | 9.59E-04 | Cerebral amyloid angiopathy (presence vs. absence)  | NG00041        |
| <i>SORCS3</i>  | upstream          | 10:106310288:A:G | rs72809856  | A      | 7.84E-04 | IGAP APOE-Stratified Analysis: APOEε4 Carriers      | NG00078        |
| <i>SORCS3</i>  | upstream          | 10:106329427:T:A | rs72811634  | A      | 8.26E-04 | IGAP APOE-Stratified Analysis: APOEε4 Carriers      | NG00078        |
| <i>SORCS3</i>  | upstream          | 10:106391470:C:T | rs7914088   | T      | 8.47E-04 | ADGC LOAD: Stage 2                                  | NG00027        |
| <i>SORCS3</i>  | in gene           | 10:106419202:C:A | rs1334604   | A      | 9.17E-04 | ADGC LOAD: African Americans - APOE Adj             | NG00039        |
| <i>SORCS3</i>  | in gene           | 10:106421691:C:T | rs4917427   | T      | 8.76E-04 | ADGC LOAD: African Americans - APOE Adj             | NG00039        |
| <i>SORCS3</i>  | in gene           | 10:106456214:G:T | rs369876476 | T      | 6.84E-04 | ADGC LOAD: African Americans - APOE Adj             | NG00039        |
| <i>SORCS3</i>  | in gene           | 10:106458490:C:G | rs148172499 | C      | 3.97E-04 | ADGC LOAD: African Americans - APOE Adj             | NG00039        |
| <i>SORCS3</i>  | in gene           | 10:106458490:C:G | rs148172499 | C      | 9.17E-04 | ADGC LOAD: African Americans                        | NG00039        |
| <i>SORCS3</i>  | in gene           | 10:106487436:C:A | rs75282214  | A      | 7.35E-05 | ADGC LOAD: African Americans                        | NG00039        |
| <i>SORCS3</i>  | in gene           | 10:106487436:C:A | rs75282214  | A      | 1.24E-04 | ADGC LOAD: African Americans - APOE Adj             | NG00039        |
| <i>SORCS3</i>  | in gene           | 10:106522154:A:G | rs145607957 | A      | 3.24E-04 | ADGC LOAD: African Americans - APOE Adj             | NG00039        |
| <i>SORCS3</i>  | in gene           | 10:106522154:A:G | rs145607957 | A      | 5.99E-04 | ADGC LOAD: African Americans                        | NG00039        |
| <i>SORCS3</i>  | in gene           | 10:106523709:G:A | rs139419298 | A      | 4.21E-04 | ADGC LOAD: African Americans - APOE Adj             | NG00039        |
| <i>SORCS3</i>  | in gene           | 10:106523709:G:A | rs139419298 | A      | 8.13E-04 | ADGC LOAD: African Americans                        | NG00039        |
| <i>SORCS3</i>  | in gene           | 10:106810615:G:A | rs117792039 | A      | 2.00E-07 | Alzheimer's disease                                 | PMID: 26830138 |
| <i>SORCS3</i>  | downstream        | 10:107103509:C:T | rs12411893  | T      | 5.90E-04 | CSF: Aβ <sub>42</sub>                               | NG00055        |
| <i>GOLGA8B</i> | in gene           | 15:34869534:A:G  | rs62004906  | A      | 6.77E-04 | Neuritic plaques (presence vs. absence); relaxed    | NG00041        |
| <i>GOLGA8B</i> | downstream        | 15:34881477:T:C  | rs150560507 | T      | 9.45E-04 | Neurofibrillary tangles (ranked by Braak groups)    | NG00041        |
| <i>GOLGA8B</i> | downstream        | 15:34919477:A:G  | rs992481554 | A      | 8.55E-04 | Neuritic plaques (presence vs. absence)             | NG00041        |
| <i>MYH11</i>   | upstream          | 16:15732092:A:G  | rs7199717   | A      | 9.28E-04 | Transethnic LOAD: All Samples, adjusted for APOE ε4 | NG00056        |
| <i>MYH11</i>   | upstream          | 16:15734125:C:T  | rs11075274  | T      | 6.72E-04 | Transethnic LOAD: All Samples, adjusted for APOE ε4 | NG00056        |
| <i>MYH11</i>   | upstream          | 16:15762901:C:T  | rs75976347  | T      | 9.69E-04 | IGAP APOE-Stratified Analysis: APOEε4 Carriers      | NG00078        |
| <i>MYH11</i>   | in gene           | 16:15885357:A:G  | rs34688090  | A      | 9.24E-04 | Transethnic LOAD: APOE ε4 Non-Carriers              | NG00056        |
| <i>MYH11</i>   | in gene           | 16:15940305:C:G  | rs215576    | C      | 8.26E-04 | ADGC LOAD Subset (non-IGAP Discovery Phase)         | NG00076        |
| <i>MYH11</i>   | downstream        | 16:16028206:AT:A | rs59481540  | A      | 5.08E-04 | ADGC LOAD Subset (non-IGAP Discovery Phase)         | NG00076        |
